# Supplementary material for: A computational probe granting insight into intra and inter-stacking interactions in squaraine dye derivatives
Source: Royal Society of Chemistry journal article supplement (doi:10.1039/d1cp01387d), 2021-01-01

## Supporting Information

### A Computational Probe Granting Insight into Intra and Inter-Stacking Interactions in Squaraine Dye Derivatives

Krishna Chaitanya Gunturu<sup>a</sup>, Carola Schulzke<sup>b</sup>

<sup>a</sup> School of Chemical Sciences, SRTM University, Vishnupuri, Nanded-431606, India

<sup>b</sup> Institute of Biochemistry, University of Greifswald, 17489 Greifswald, Germany

Table S1: Selected metrical parameters (bond lengths in Å and dihedral angles in °) of all motifs obtained from crystal structures.

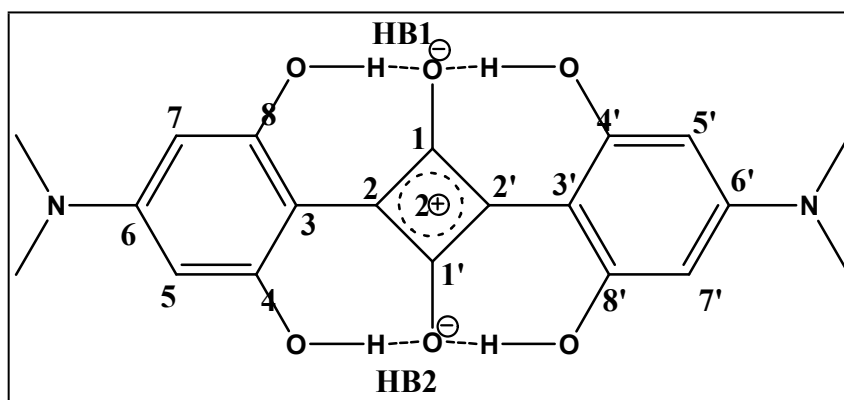

| Geometrical Indices | Motif-1     | Motif-2     | Motif-3     | Motif-4     |
|---------------------|-------------|-------------|-------------|-------------|
| C1-O                | 1.25        | 1.252       | 1.252       | 1.248       |
| C1-C2               | 1.459/1.452 | 1.457/1.463 | 1.463/1.460 | 1.454/1.438 |
| C2-C3               | 1.400       | 1.399       | 1.407/1.406 | 1.379       |
| C3-C4               | 1.441       | 1.436       | 1.444       | 1.434       |
| C4-C5               | 1.370       | 1.365       | 1.371       | 1.349       |
| C5-C6               | 1.417       | 1.419       | 1.422       | 1.402       |
| C6-C7               | 1.419       | 1.414       | 1.424       | 1.426       |
| C7-C8               | 1.370       | 1.367       | 1.372       | 1.356       |
| C8-C3               | 1.439       | 1.434       | 1.440       | 1.419       |
| C6-N                | 1.357       | 1.359       | 1.354       | 1.341       |
| C4-O                | 1.351       | 1.361       | 1.360       | 1.359       |
| C8-O                | 1.350       | 1.355       | 1.356       | 1.351       |
| HB1                 | 1.788       | 1.746       | 1.757       | 1.665       |
| HB2                 | 1.775       | 1.657       | 1.637       | 1.653       |
| O-1-2-3             | 1.31        | -1.33       | 0.74        | 1.26        |
| O-1-2'-3'           | -0.77       | 0.78        | 0.04        | -0.25       |
| 1-2-3-8             | 0.57        | -3.55       | -0.31       | -1.80       |
| 1'-2-3-4            | -0.51       | -3.03       | -0.56       | -1.13       |
| 5-6-N-C             | 2.49        | 0.04        | 6.64        | 8.49        |
| 7-6-N-C             | 1.35        | 0.77        | -0.39       | 2.52        |

Table S2: Selected metrical parameters of neutral, cationic and anionic species (bond lengths in Å and dihedral angles in °) of all motifs obtained at the B3LYP/6-31G+(d,p) level of theory. Motif-1 and motif-2 have the same chemical structure and therefore the calculations are identical.

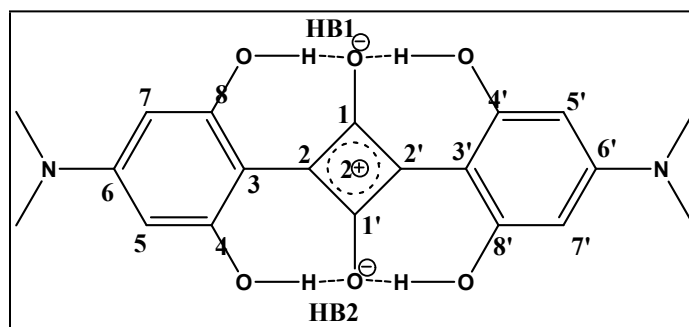

| Motif-1(Motif-2)    |        |        |         |
|---------------------|--------|--------|---------|
| Geometrical Indices | Cation | Anion  | Neutral |
| C1-O                | 1.244  | 1.262  | 1.254   |
| C1-C2               | 1.470  | 1.459  | 1.460   |
| C2-C3               | 1.395  | 1.431  | 1.404   |
| C3-C4               | 1.463  | 1.428  | 1.448   |
| C4-C5               | 1.375  | 1.396  | 1.383   |
| C5-C6               | 1.430  | 1.410  | 1.420   |
| C6-C7               | 1.429  | 1.410  | 1.419   |
| C7-C8               | 1.375  | 1.395  | 1.383   |
| C8-C3               | 1.463  | 1.430  | 1.448   |
| C6-N                | 1.353  | 1.405  | 1.373   |
| C4-O                | 1.337  | 1.358  | 1.344   |
| C8-O                | 1.337  | 1.359  | 1.345   |
| HB1                 | 1.679  | 1.694  | 1.675   |
| HB2                 | 1.676  | 1.694  | 1.677   |
| O-1-2-3             | -0.02  | -0.05  | -0.01   |
| O-1-2'-3'           | 0.05   | -0.12  | -0.02   |
| 1-2-3-8             | -0.07  | -0.09  | -0.05   |
| 1'-2-3-4            | 0.13   | -0.20  | 0.11    |
| 5-6-N-C             | -2.28  | -5.24  | 2.11    |
| 7-6-N-C             | -3.40  | -13.93 | 4.06    |
| Motif-3             |        |        |         |
| Geometrical Indices | Cation | Anion  | Neutral |
| C1-O                | 1.243  | 1.261  | 1.254   |
| C1-C2               | 1.470  | 1.459  | 1.460   |
| C2-C3               | 1.394  | 1.431  | 1.404   |

|                     |        |        |         |
|---------------------|--------|--------|---------|
| C3-C4               | 1.464  | 1.428  | 1.448   |
| C4-C5               | 1.375  | 1.397  | 1.384   |
| C5-C6               | 1.429  | 1.406  | 1.420   |
| C6-C7               | 1.429  | 1.409  | 1.419   |
| C7-C8               | 1.375  | 1.394  | 1.383   |
| C8-C3               | 1.463  | 1.432  | 1.448   |
| C6-N                | 1.352  | 1.413  | 1.373   |
| C4-O                | 1.336  | 1.358  | 1.344   |
| C8-O                | 1.337  | 1.358  | 1.345   |
| HB1                 | 1.676  | 1.691  | 1.674   |
| HB2                 | 1.679  | 1.692  | 1.676   |
| O-1-2-3             | -0.15  | -0.07  | 0.10    |
| O-1-2'-3'           | 0.03   | -0.09  | 0.09    |
| 1-2-3-8             | -0.14  | -0.12  | -0.13   |
| 1'-2-3-4            | -0.19  | -0.60  | 0.24    |
| 5-6-N-C             | -5.14  | -5.97  | 3.66    |
| 7-6-N-C             | -7.79  | -37.52 | 9.90    |
| Motif-4             |        |        |         |
| Geometrical Indices | Cation | Anion  | Neutral |
| C1-O                | 1.243  | 1.261  | 1.254   |
| C1-C2               | 1.470  | 1.459  | 1.460   |
| C2-C3               | 1.394  | 1.431  | 1.404   |
| C3-C4               | 1.464  | 1.432  | 1.448   |
| C4-C5               | 1.375  | 1.394  | 1.383   |
| C5-C6               | 1.429  | 1.409  | 1.419   |
| C6-C7               | 1.429  | 1.406  | 1.420   |
| C7-C8               | 1.375  | 1.397  | 1.383   |
| C8-C3               | 1.463  | 1.429  | 1.448   |
| C6-N                | 1.352  | 1.412  | 1.373   |
| C4-O                | 1.336  | 1.358  | 1.345   |
| C8-O                | 1.337  | 1.358  | 1.344   |
| HB1                 | 1.676  | 1.692  | 1.676   |
| HB2                 | 1.679  | 1.691  | 1.674   |
| O-1-2-3             | 0.17   | -0.09  | -0.08   |
| O-1-2'-3'           | -0.03  | -0.08  | -0.12   |
| 1-2-3-8             | 0.13   | 0.61   | 0.22    |
| 1'-2-3-4            | 0.18   | 0.12   | -0.13   |
| 5-6-N-C             | 5.31   | 5.44   | 9.81    |
| 7-6-N-C             | 7.98   | 36.17  | 3.78    |

Table S3: At B3LYP/6-31G+(d,p) level of theory calculated interaction energies  $\Delta E_{int}^{CP}$  (kcal/mol), effective charge transfer integrals ( $(J_{eff})_{ij}$  in eV), rate constants (in  $S^{-1}$ ), and drift mobilities for hole and electron transfer ( $\mu$  in  $cm^2/V s$ ) of all motifs. The observed centroid-centroid distances are given as  $d_{cc}$  (in Å).

| Motif     | Interactions                                                                       | $d_{cc}$ | $J_+$                       | $J_-$                       | $K_+$                 | $K_-$                 | $\mu_+$ | $\mu_-$ |
|-----------|------------------------------------------------------------------------------------|----------|-----------------------------|-----------------------------|-----------------------|-----------------------|---------|---------|
| Motif-1-1 | 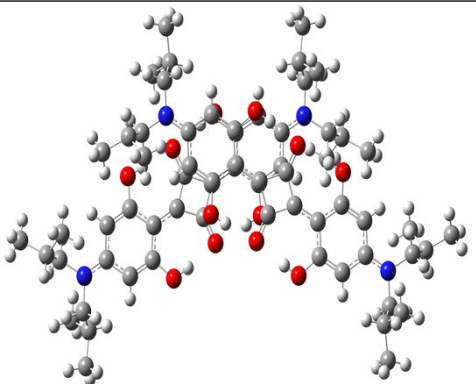  | 5.40     | -<br>$9.08 \times 10^{-02}$ | $5.15 \times 10^{-02}$      | $7.85 \times 10^{13}$ | $3.65 \times 10^{12}$ | 1.1067  | 0.0514  |
| Motif-1-2 |  | 11.81    | -<br>$2.38 \times 10^{-05}$ | -<br>$4.51 \times 10^{-04}$ | $5.39 \times 10^{06}$ | $2.8 \times 10^{08}$  |         |         |

|           |                                                                                    |       |                        |                        |                       |                       |  |  |
|-----------|------------------------------------------------------------------------------------|-------|------------------------|------------------------|-----------------------|-----------------------|--|--|
| Motif-1-3 | 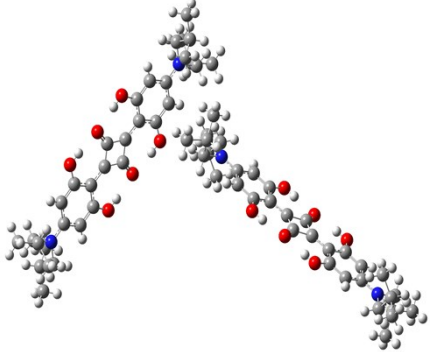  | 12.99 | $1.21 \times 10^{-03}$ | $1.05 \times 10^{-03}$ | $1.40 \times 10^{10}$ | $1.51 \times 10^{09}$ |  |  |
| Motif-1-4 |   | 15.98 | $2.56 \times 10^{-04}$ | $1.18 \times 10^{-04}$ | $6.24 \times 10^{08}$ | $1.93 \times 10^{07}$ |  |  |
| Motif-1-5 |  | 16.01 | $3.11 \times 10^{-04}$ | $1.00 \times 10^{-04}$ | $9.18 \times 10^{08}$ | $1.38 \times 10^{07}$ |  |  |

|           |                                                                                     |       |                             |                        |                       |                       |        |        |
|-----------|-------------------------------------------------------------------------------------|-------|-----------------------------|------------------------|-----------------------|-----------------------|--------|--------|
| Motif-1-6 | 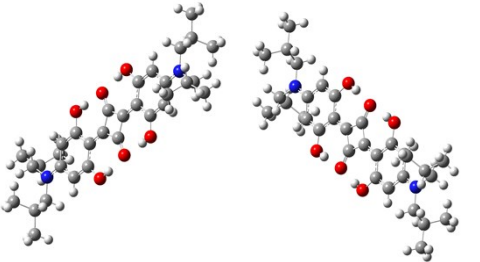   | 16.20 | -<br>$9.93 \times 10^{-05}$ | $9.04 \times 10^{-05}$ | $9.38 \times 10^{07}$ | $1.13 \times 10^{07}$ |        |        |
| Motif-1-7 |    | 18.52 | -<br>$1.31 \times 10^{-04}$ | $1.34 \times 10^{-04}$ | $1.64 \times 10^{08}$ | $2.45 \times 10^{07}$ |        |        |
| Motif-1-8 |   | 22.11 | -<br>$7.01 \times 10^{-04}$ | $4.05 \times 10^{-04}$ | $4.68 \times 10^{09}$ | $2.25 \times 10^{08}$ |        |        |
| Motif-2-1 |  | 6.20  | -<br>$3.31 \times 10^{-02}$ | $2.37 \times 10^{-03}$ | $1.04 \times 10^{13}$ | $7.74 \times 10^{09}$ | 0.3099 | 0.0003 |

|           |                                                                                    |       |                             |                             |                       |                       |  |  |
|-----------|------------------------------------------------------------------------------------|-------|-----------------------------|-----------------------------|-----------------------|-----------------------|--|--|
| Motif-2-2 | 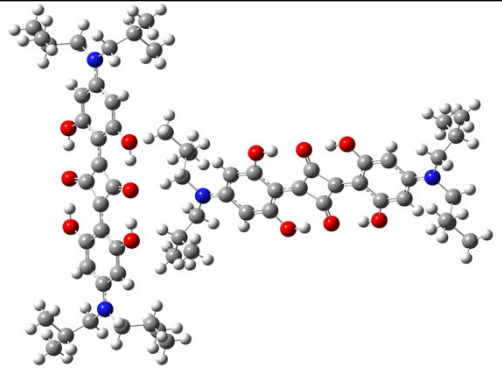  | 11.31 | -<br>$3.74 \times 10^{-04}$ | $1.48 \times 10^{-03}$      | $1.33 \times 10^{09}$ | $3.02 \times 10^{09}$ |  |  |
| Motif-2-3 |   | 11.47 | -<br>$1.76 \times 10^{-04}$ | -<br>$2.90 \times 10^{-04}$ | $2.94 \times 10^{08}$ | $1.16 \times 10^{08}$ |  |  |
| Motif-2-4 |  | 14.18 | -<br>$1.50 \times 10^{-03}$ | -<br>$7.14 \times 10^{-04}$ | $2.15 \times 10^{10}$ | $7.02 \times 10^{08}$ |  |  |

|           |                                                                                     |       |                        |                        |                       |                       |        |        |
|-----------|-------------------------------------------------------------------------------------|-------|------------------------|------------------------|-----------------------|-----------------------|--------|--------|
| Motif-2-5 | 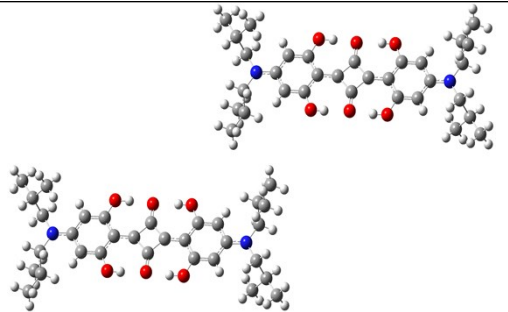   | 17.61 | $2.78 \times 10^{-04}$ | $1.72 \times 10^{-04}$ | $7.33 \times 10^{08}$ | $4.06 \times 10^{07}$ |        |        |
| Motif-3-1 |    | 5.22  | $8.12 \times 10^{-03}$ | $7.57 \times 10^{-02}$ | $5.32 \times 10^{11}$ | $2.2 \times 10^{12}$  | 0.0558 | 0.0332 |
| Motif-3-2 |   | 11.18 | $3.76 \times 10^{-03}$ | $2.63 \times 10^{-03}$ | $1.14 \times 10^{11}$ | $2.65 \times 10^{09}$ |        |        |
| Motif-3-3 |  | 12.73 | $2.81 \times 10^{-03}$ | $8.75 \times 10^{-05}$ | $6.38 \times 10^{10}$ | $2.94 \times 10^{06}$ |        |        |



|           |                                                                                     |       |                        |                        |                       |                       |  |  |
|-----------|-------------------------------------------------------------------------------------|-------|------------------------|------------------------|-----------------------|-----------------------|--|--|
| Motif-3-4 | 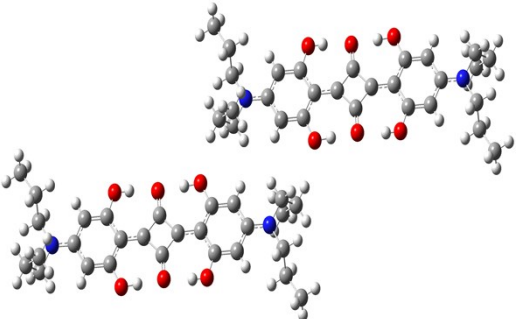   | 13.63 | $1.13 \times 10^{-02}$ | $6.32 \times 10^{-03}$ | $1.03 \times 10^{12}$ | $1.53 \times 10^{10}$ |  |  |
| Motif-3-5 |    | 15.93 | $1.65 \times 10^{-03}$ | $8.82 \times 10^{-04}$ | $2.19 \times 10^{10}$ | $2.99 \times 10^{08}$ |  |  |
| Motif-3-6 |   | 17.54 | $2.41 \times 10^{-04}$ | $6.36 \times 10^{-05}$ | $4.69 \times 10^{08}$ | $1.55 \times 10^{06}$ |  |  |
| Motif-3-7 |  | 19.46 | $4.27 \times 10^{-04}$ | $1.39 \times 10^{-04}$ | $1.47 \times 10^{09}$ | $7.44 \times 10^{06}$ |  |  |

|           |                                                                                   |       |                        |                        |                       |                       |        |        |
|-----------|-----------------------------------------------------------------------------------|-------|------------------------|------------------------|-----------------------|-----------------------|--------|--------|
| Motif-4-1 | 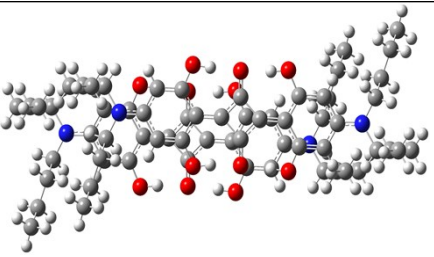 | 5.17  | $8.61 \times 10^{-03}$ | $5.56 \times 10^{-02}$ | $6.14 \times 10^{11}$ | $1.34 \times 10^{12}$ | 0.0300 | 0.0692 |
| Motif-4-2 |  | 10.86 | $3.24 \times 10^{-03}$ | $2.48 \times 10^{-03}$ | $8.68 \times 10^{10}$ | $2.66 \times 10^{09}$ |        |        |

Table S4: Hirshfeld contact surfaces ( $C_{XY}$ ) and random contacts ( $R_{XY}$ ) of the main intermolecular interactions for all motifs in this study.<sup>a</sup>

| $C_{XY}$ | Motif-1 | Motif-2 | Motif-3 | Motif-4 |
|----------|---------|---------|---------|---------|
| H---H    | 0.05    | 0.03    | 0.03    | 0.01    |
| C---H    | 0.24    | 0.45    | 0.52    | 0.38    |
| C---C    | 1.18    | 0.34    | 1.63    | 1.17    |
| C---N    | 0       | 0       | 0       | 0       |
| O---H    | 0.27    | 0.04    | 0.07    | 0.03    |
| O---C    | 0.71    | 1.21    | 1.42    | 1.14    |
| O---N    | 0       | 0       | 0.02    | 0.02    |
| HC---H   | 0.93    | 0.91    | 1.17    | 0.78    |
| HC---C   | 3.27    | 4.44    | 3.77    | 3.01    |
| HC---N   | 0.02    | 0       | 0       | 0       |
| HC---O   | 2.6     | 2.45    | 3.31    | 2.44    |
| HC---HC  | 7.05    | 6.9     | 6.77    | 7.31    |

| $R_{XY}$ | Motif-1 | Motif-2 | Motif-3 | Motif-4 |
|----------|---------|---------|---------|---------|
| H---H    | 1.35    | 1.13    | 1.24    | 0.83    |
| C---H    | 11.53   | 10.47   | 12.37   | 9.53    |
| C---C    | 24.54   | 24.22   | 30.9    | 27.53   |
| C---N    | 0.13    | 0.01    | 1.06    | 0.93    |
| O---H    | 6.53    | 5.78    | 6.56    | 4.99    |
| O---C    | 27.82   | 26.79   | 32.78   | 28.81   |
| O---N    | 0.08    | 0       | 0.56    | 0.49    |
| HC---H   | 36.64   | 33.33   | 29.63   | 28.56   |
| HC---C   | 156.29  | 154.73  | 148.22  | 165.01  |
| HC---N   | 0.43    | 0.02    | 2.52    | 2.78    |
| HC---O   | 88.48   | 85.38   | 78.6    | 86.34   |
| HC---HC  | 248.32  | 246.18  | 177.36  | 246.86  |

<sup>a</sup> The HC refers to H-C hydrogen atom.

Table S5: Optimized Cartesian coordinates of all motifs obtained at the B3LYP/6-31G+(d,p) level of theory. Motif-1 and motif-2 have the same chemical structure and therefore the coordinates are identical.

| <b>Motif</b>        |         | <b>Cartesian Coordinates</b> |           |           |           |
|---------------------|---------|------------------------------|-----------|-----------|-----------|
| Motif-1/<br>Motif-2 | Neutral | 8                            | 0.460390  | -1.978538 | 1.003610  |
|                     |         | 8                            | -0.905087 | -3.408983 | -0.777626 |
|                     |         | 1                            | -0.379907 | -2.945755 | -0.074635 |
|                     |         | 8                            | -1.899382 | 0.865084  | -2.948343 |
|                     |         | 1                            | -1.378160 | 1.351842  | -2.258910 |
|                     |         | 7                            | -3.519344 | -3.229477 | -4.716018 |
|                     |         | 6                            | 0.205591  | -0.883517 | 0.448232  |
|                     |         | 6                            | -0.553628 | -0.504309 | -0.740089 |
|                     |         | 6                            | -1.292028 | -1.177060 | -1.726608 |
|                     |         | 6                            | -1.447027 | -2.616226 | -1.718683 |

|  |  |   |           |           |           |
|--|--|---|-----------|-----------|-----------|
|  |  | 6 | -2.174146 | -3.267421 | -2.698926 |
|  |  | 1 | -2.231586 | -4.342148 | -2.613580 |
|  |  | 6 | -2.805965 | -2.557914 | -3.754257 |
|  |  | 6 | -2.672560 | -1.145073 | -3.774016 |
|  |  | 1 | -3.137851 | -0.530854 | -4.529789 |
|  |  | 6 | -1.946167 | -0.471784 | -2.809035 |
|  |  | 6 | -3.611553 | -4.695748 | -4.708577 |
|  |  | 1 | -4.470940 | -4.966523 | -5.330730 |
|  |  | 1 | -3.850882 | -5.041580 | -3.696755 |
|  |  | 6 | -2.364406 | -5.444608 | -5.233307 |
|  |  | 1 | -1.508860 | -5.150660 | -4.613079 |
|  |  | 6 | -2.578354 | -6.956790 | -5.067936 |
|  |  | 1 | -3.430842 | -7.303444 | -5.666303 |
|  |  | 1 | -2.770277 | -7.226916 | -4.023266 |
|  |  | 1 | -1.695229 | -7.513382 | -5.398207 |
|  |  | 6 | -2.031324 | -5.084690 | -6.687913 |
|  |  | 1 | -1.841301 | -4.013256 | -6.805754 |
|  |  | 1 | -2.848528 | -5.366437 | -7.364809 |
|  |  | 1 | -1.132554 | -5.616415 | -7.018277 |
|  |  | 6 | -4.267910 | -2.553189 | -5.782619 |
|  |  | 1 | -4.121536 | -3.132677 | -6.700378 |
|  |  | 1 | -3.830834 | -1.571827 | -5.975218 |
|  |  | 6 | -5.786898 | -2.412524 | -5.527965 |
|  |  | 1 | -6.185629 | -3.422383 | -5.352330 |
|  |  | 6 | -6.461005 | -1.855600 | -6.791792 |
|  |  | 1 | -6.271351 | -2.488986 | -7.666157 |
|  |  | 1 | -6.094043 | -0.847463 | -7.021899 |
|  |  | 1 | -7.545530 | -1.788239 | -6.657163 |
|  |  | 6 | -6.116216 | -1.556919 | -4.297288 |
|  |  | 1 | -5.787534 | -0.520109 | -4.434643 |
|  |  | 1 | -5.636606 | -1.942035 | -3.392800 |
|  |  | 1 | -7.197623 | -1.541482 | -4.122458 |
|  |  | 8 | -0.460390 | 1.978538  | -1.003610 |

|  |  |   |           |           |           |
|--|--|---|-----------|-----------|-----------|
|  |  | 8 | 0.905087  | 3.408983  | 0.777626  |
|  |  | 1 | 0.379907  | 2.945755  | 0.074635  |
|  |  | 8 | 1.899382  | -0.865084 | 2.948343  |
|  |  | 1 | 1.378160  | -1.351842 | 2.258910  |
|  |  | 7 | 3.519344  | 3.229477  | 4.716018  |
|  |  | 6 | -0.205591 | 0.883517  | -0.448232 |
|  |  | 6 | 0.553628  | 0.504309  | 0.740089  |
|  |  | 6 | 1.292028  | 1.177060  | 1.726608  |
|  |  | 6 | 1.447027  | 2.616226  | 1.718683  |
|  |  | 6 | 2.174146  | 3.267421  | 2.698926  |
|  |  | 1 | 2.231586  | 4.342148  | 2.613580  |
|  |  | 6 | 2.805965  | 2.557914  | 3.754257  |
|  |  | 6 | 2.672560  | 1.145073  | 3.774016  |
|  |  | 1 | 3.137851  | 0.530854  | 4.529789  |
|  |  | 6 | 1.946167  | 0.471784  | 2.809035  |
|  |  | 6 | 3.611553  | 4.695748  | 4.708577  |
|  |  | 1 | 4.470940  | 4.966523  | 5.330730  |
|  |  | 1 | 3.850882  | 5.041580  | 3.696755  |
|  |  | 6 | 2.364406  | 5.444608  | 5.233307  |
|  |  | 1 | 1.508860  | 5.150660  | 4.613079  |
|  |  | 6 | 2.578354  | 6.956790  | 5.067936  |
|  |  | 1 | 3.430842  | 7.303444  | 5.666303  |
|  |  | 1 | 2.770277  | 7.226916  | 4.023266  |
|  |  | 1 | 1.695229  | 7.513382  | 5.398207  |
|  |  | 6 | 2.031324  | 5.084690  | 6.687913  |
|  |  | 1 | 1.841301  | 4.013256  | 6.805754  |
|  |  | 1 | 2.848528  | 5.366437  | 7.364809  |
|  |  | 1 | 1.132554  | 5.616415  | 7.018277  |
|  |  | 6 | 4.267910  | 2.553189  | 5.782619  |
|  |  | 1 | 4.121536  | 3.132677  | 6.700378  |
|  |  | 1 | 3.830834  | 1.571827  | 5.975218  |
|  |  | 6 | 5.786898  | 2.412524  | 5.527965  |
|  |  | 1 | 6.185629  | 3.422383  | 5.352330  |

|  |        |   |           |           |           |
|--|--------|---|-----------|-----------|-----------|
|  |        | 6 | 6.461005  | 1.855600  | 6.791792  |
|  |        | 1 | 6.271351  | 2.488986  | 7.666157  |
|  |        | 1 | 6.094043  | 0.847463  | 7.021899  |
|  |        | 1 | 7.545530  | 1.788239  | 6.657163  |
|  |        | 6 | 6.116216  | 1.556919  | 4.297288  |
|  |        | 1 | 5.787534  | 0.520109  | 4.434643  |
|  |        | 1 | 5.636606  | 1.942035  | 3.392800  |
|  |        | 1 | 7.197623  | 1.541482  | 4.122458  |
|  | Cation | 8 | 0.460860  | -1.975064 | 1.003984  |
|  |        | 8 | -0.908023 | -3.412222 | -0.764950 |
|  |        | 1 | -0.379934 | -2.958197 | -0.061358 |
|  |        | 8 | -1.906544 | 0.867616  | -2.944839 |
|  |        | 1 | -1.386317 | 1.362867  | -2.264218 |
|  |        | 7 | -3.514706 | -3.221426 | -4.687596 |
|  |        | 6 | 0.207884  | -0.889713 | 0.452205  |
|  |        | 6 | -0.559116 | -0.507812 | -0.742002 |
|  |        | 6 | -1.295298 | -1.177009 | -1.719339 |
|  |        | 6 | -1.449897 | -2.631831 | -1.705113 |
|  |        | 6 | -2.175414 | -3.275805 | -2.679208 |
|  |        | 1 | -2.239808 | -4.349911 | -2.596417 |
|  |        | 6 | -2.810909 | -2.559513 | -3.740674 |
|  |        | 6 | -2.679132 | -1.136784 | -3.765491 |
|  |        | 1 | -3.145011 | -0.529990 | -4.526080 |
|  |        | 6 | -1.956852 | -0.461857 | -2.810302 |
|  |        | 6 | -3.611563 | -4.697640 | -4.690929 |
|  |        | 1 | -4.473857 | -4.952080 | -5.312181 |
|  |        | 1 | -3.846476 | -5.041385 | -3.679880 |
|  |        | 6 | -2.362569 | -5.435258 | -5.230893 |
|  |        | 1 | -1.507743 | -5.156590 | -4.601832 |
|  |        | 6 | -2.590139 | -6.948300 | -5.088637 |
|  |        | 1 | -3.438343 | -7.280951 | -5.699039 |
|  |        | 1 | -2.788549 | -7.235824 | -4.050250 |
|  |        | 1 | -1.706910 | -7.500547 | -5.423051 |

|  |  |   |           |           |           |
|--|--|---|-----------|-----------|-----------|
|  |  | 6 | -2.025393 | -5.054154 | -6.679064 |
|  |  | 1 | -1.811349 | -3.985784 | -6.786337 |
|  |  | 1 | -2.844502 | -5.313635 | -7.361232 |
|  |  | 1 | -1.137061 | -5.598042 | -7.014582 |
|  |  | 6 | -4.259441 | -2.549894 | -5.771580 |
|  |  | 1 | -4.101350 | -3.148404 | -6.672495 |
|  |  | 1 | -3.823306 | -1.570917 | -5.969269 |
|  |  | 6 | -5.780388 | -2.418485 | -5.513886 |
|  |  | 1 | -6.172912 | -3.426993 | -5.323356 |
|  |  | 6 | -6.448171 | -1.886273 | -6.792165 |
|  |  | 1 | -6.255860 | -2.535579 | -7.653151 |
|  |  | 1 | -6.086579 | -0.880809 | -7.038955 |
|  |  | 1 | -7.532133 | -1.822763 | -6.658742 |
|  |  | 6 | -6.114025 | -1.540852 | -4.300397 |
|  |  | 1 | -5.785116 | -0.506375 | -4.453692 |
|  |  | 1 | -5.652834 | -1.911617 | -3.379606 |
|  |  | 1 | -7.196298 | -1.519941 | -4.138801 |
|  |  | 8 | -0.460860 | 1.975064  | -1.003984 |
|  |  | 8 | 0.908023  | 3.412222  | 0.764950  |
|  |  | 1 | 0.379934  | 2.958197  | 0.061358  |
|  |  | 8 | 1.906544  | -0.867616 | 2.944839  |
|  |  | 1 | 1.386317  | -1.362867 | 2.264218  |
|  |  | 7 | 3.514706  | 3.221426  | 4.687596  |
|  |  | 6 | -0.207884 | 0.889713  | -0.452205 |
|  |  | 6 | 0.559116  | 0.507812  | 0.742002  |
|  |  | 6 | 1.295298  | 1.177009  | 1.719339  |
|  |  | 6 | 1.449897  | 2.631831  | 1.705113  |
|  |  | 6 | 2.175414  | 3.275805  | 2.679208  |
|  |  | 1 | 2.239808  | 4.349911  | 2.596417  |
|  |  | 6 | 2.810909  | 2.559513  | 3.740674  |
|  |  | 6 | 2.679132  | 1.136784  | 3.765491  |
|  |  | 1 | 3.145011  | 0.529990  | 4.526080  |
|  |  | 6 | 1.956852  | 0.461857  | 2.810302  |

|  |       |   |           |           |           |
|--|-------|---|-----------|-----------|-----------|
|  |       | 6 | 3.611563  | 4.697640  | 4.690929  |
|  |       | 1 | 4.473857  | 4.952080  | 5.312181  |
|  |       | 1 | 3.846476  | 5.041385  | 3.679880  |
|  |       | 6 | 2.362569  | 5.435258  | 5.230893  |
|  |       | 1 | 1.507743  | 5.156590  | 4.601832  |
|  |       | 6 | 2.590139  | 6.948300  | 5.088637  |
|  |       | 1 | 3.438343  | 7.280951  | 5.699039  |
|  |       | 1 | 2.788549  | 7.235824  | 4.050250  |
|  |       | 1 | 1.706910  | 7.500547  | 5.423051  |
|  |       | 6 | 2.025393  | 5.054154  | 6.679064  |
|  |       | 1 | 1.811349  | 3.985784  | 6.786337  |
|  |       | 1 | 2.844502  | 5.313635  | 7.361232  |
|  |       | 1 | 1.137061  | 5.598042  | 7.014582  |
|  |       | 6 | 4.259441  | 2.549894  | 5.771580  |
|  |       | 1 | 4.101350  | 3.148404  | 6.672495  |
|  |       | 1 | 3.823306  | 1.570917  | 5.969269  |
|  |       | 6 | 5.780388  | 2.418485  | 5.513886  |
|  |       | 1 | 6.172912  | 3.426993  | 5.323356  |
|  |       | 6 | 6.448171  | 1.886273  | 6.792165  |
|  |       | 1 | 6.255860  | 2.535579  | 7.653151  |
|  |       | 1 | 6.086579  | 0.880809  | 7.038955  |
|  |       | 1 | 7.532133  | 1.822763  | 6.658742  |
|  |       | 6 | 6.114025  | 1.540852  | 4.300397  |
|  |       | 1 | 5.785116  | 0.506375  | 4.453692  |
|  |       | 1 | 5.652834  | 1.911617  | 3.379606  |
|  |       | 1 | 7.196298  | 1.519941  | 4.138801  |
|  | Anion | 8 | 0.290927  | -1.961158 | 1.098102  |
|  |       | 8 | -1.069987 | -3.386048 | -0.723197 |
|  |       | 1 | -0.558899 | -2.910160 | -0.017751 |
|  |       | 8 | -1.706628 | 0.841113  | -3.084051 |
|  |       | 1 | -1.188355 | 1.307837  | -2.377962 |
|  |       | 7 | -3.503208 | -3.236371 | -4.822051 |
|  |       | 6 | 0.128807  | -0.869300 | 0.486943  |



|  |  |   |           |           |           |
|--|--|---|-----------|-----------|-----------|
|  |  | 6 | -0.547648 | -0.502810 | -0.752926 |
|  |  | 6 | -1.289460 | -1.183181 | -1.770170 |
|  |  | 6 | -1.525990 | -2.591073 | -1.725829 |
|  |  | 6 | -2.251077 | -3.249643 | -2.720369 |
|  |  | 1 | -2.374918 | -4.315823 | -2.590088 |
|  |  | 6 | -2.787424 | -2.554305 | -3.823278 |
|  |  | 6 | -2.564073 | -1.163780 | -3.886417 |
|  |  | 1 | -2.939009 | -0.547704 | -4.691939 |
|  |  | 6 | -1.842189 | -0.497599 | -2.896617 |
|  |  | 6 | -3.607463 | -4.689658 | -4.795992 |
|  |  | 1 | -4.432947 | -4.974697 | -5.459972 |
|  |  | 1 | -3.895853 | -5.037179 | -3.793776 |
|  |  | 6 | -2.337228 | -5.447924 | -5.250196 |
|  |  | 1 | -1.510856 | -5.124933 | -4.605872 |
|  |  | 6 | -2.536057 | -6.958110 | -5.057905 |
|  |  | 1 | -3.366964 | -7.329052 | -5.673962 |
|  |  | 1 | -2.758925 | -7.204151 | -4.013098 |
|  |  | 1 | -1.637026 | -7.514551 | -5.346319 |
|  |  | 6 | -1.961116 | -5.112398 | -6.699613 |
|  |  | 1 | -1.814218 | -4.035552 | -6.827713 |
|  |  | 1 | -2.744895 | -5.438066 | -7.397785 |
|  |  | 1 | -1.030293 | -5.614331 | -6.988743 |
|  |  | 6 | -4.309391 | -2.547540 | -5.821022 |
|  |  | 1 | -4.211778 | -3.090966 | -6.770807 |
|  |  | 1 | -3.896308 | -1.553078 | -6.005615 |
|  |  | 6 | -5.818248 | -2.419033 | -5.493508 |
|  |  | 1 | -6.206938 | -3.436574 | -5.335038 |
|  |  | 6 | -6.558226 | -1.818138 | -6.698871 |
|  |  | 1 | -6.407487 | -2.415893 | -7.606393 |
|  |  | 1 | -6.204377 | -0.800083 | -6.907343 |
|  |  | 1 | -7.636557 | -1.759866 | -6.511210 |
|  |  | 6 | -6.083941 | -1.610793 | -4.216490 |
|  |  | 1 | -5.753882 | -0.571570 | -4.330349 |

|  |  |   |           |           |           |
|--|--|---|-----------|-----------|-----------|
|  |  | 1 | -5.552048 | -2.029870 | -3.358210 |
|  |  | 1 | -7.155747 | -1.599831 | -3.983031 |
|  |  | 8 | -0.290927 | 1.961158  | -1.098102 |
|  |  | 8 | 1.069987  | 3.386048  | 0.723197  |
|  |  | 1 | 0.558899  | 2.910160  | 0.017751  |
|  |  | 8 | 1.706628  | -0.841113 | 3.084051  |
|  |  | 1 | 1.188355  | -1.307837 | 2.377962  |
|  |  | 7 | 3.503208  | 3.236371  | 4.822051  |
|  |  | 6 | -0.128807 | 0.869300  | -0.486943 |
|  |  | 6 | 0.547648  | 0.502810  | 0.752926  |
|  |  | 6 | 1.289460  | 1.183181  | 1.770170  |
|  |  | 6 | 1.525990  | 2.591073  | 1.725829  |
|  |  | 6 | 2.251077  | 3.249643  | 2.720369  |
|  |  | 1 | 2.374918  | 4.315823  | 2.590088  |
|  |  | 6 | 2.787424  | 2.554305  | 3.823278  |
|  |  | 6 | 2.564073  | 1.163780  | 3.886417  |
|  |  | 1 | 2.939009  | 0.547704  | 4.691939  |
|  |  | 6 | 1.842189  | 0.497599  | 2.896617  |
|  |  | 6 | 3.607463  | 4.689658  | 4.795992  |
|  |  | 1 | 4.432947  | 4.974697  | 5.459972  |
|  |  | 1 | 3.895853  | 5.037179  | 3.793776  |
|  |  | 6 | 2.337228  | 5.447924  | 5.250196  |
|  |  | 1 | 1.510856  | 5.124933  | 4.605872  |
|  |  | 6 | 2.536057  | 6.958110  | 5.057905  |
|  |  | 1 | 3.366964  | 7.329052  | 5.673962  |
|  |  | 1 | 2.758925  | 7.204151  | 4.013098  |
|  |  | 1 | 1.637026  | 7.514551  | 5.346319  |
|  |  | 6 | 1.961116  | 5.112398  | 6.699613  |
|  |  | 1 | 1.814218  | 4.035552  | 6.827713  |
|  |  | 1 | 2.744895  | 5.438066  | 7.397785  |
|  |  | 1 | 1.030293  | 5.614331  | 6.988743  |
|  |  | 6 | 4.309391  | 2.547540  | 5.821022  |
|  |  | 1 | 4.211778  | 3.090966  | 6.770807  |

|         |         |   |          |           |           |
|---------|---------|---|----------|-----------|-----------|
|         |         | 1 | 3.896308 | 1.553078  | 6.005615  |
|         |         | 6 | 5.818248 | 2.419033  | 5.493508  |
|         |         | 1 | 6.206938 | 3.436574  | 5.335038  |
|         |         | 6 | 6.558226 | 1.818138  | 6.698871  |
|         |         | 1 | 6.407487 | 2.415893  | 7.606393  |
|         |         | 1 | 6.204377 | 0.800083  | 6.907343  |
|         |         | 1 | 7.636557 | 1.759866  | 6.511210  |
|         |         | 6 | 6.083941 | 1.610793  | 4.216490  |
|         |         | 1 | 5.753882 | 0.571570  | 4.330349  |
|         |         | 1 | 5.552048 | 2.029870  | 3.358210  |
|         |         | 1 | 7.155747 | 1.599831  | 3.983031  |
| Motif-3 | Neutral | 8 | 0.063339 | 2.264869  | 0.010131  |
|         |         | 8 | 2.710142 | 2.372425  | 0.264235  |
|         |         | 8 | 2.575992 | -2.521599 | 0.230470  |
|         |         | 7 | 6.676041 | -0.175097 | 0.664761  |
|         |         | 6 | 0.028237 | 1.011466  | 0.004484  |
|         |         | 6 | 1.047611 | -0.029681 | 0.100580  |
|         |         | 1 | 1.723079 | 2.414194  | 0.172013  |
|         |         | 6 | 2.444505 | -0.069006 | 0.236343  |
|         |         | 1 | 1.588462 | -2.507532 | 0.138162  |
|         |         | 6 | 3.240244 | 1.137984  | 0.312172  |
|         |         | 6 | 4.616566 | 1.085684  | 0.443154  |
|         |         | 1 | 5.126602 | 2.036148  | 0.493183  |
|         |         | 6 | 5.310818 | -0.150071 | 0.519563  |
|         |         | 6 | 4.549066 | -1.344745 | 0.438282  |
|         |         | 1 | 5.006594 | -2.322547 | 0.446708  |
|         |         | 6 | 3.172878 | -1.318857 | 0.303662  |
|         |         | 6 | 7.460698 | 1.066429  | 0.664857  |
|         |         | 1 | 8.426134 | 0.833050  | 1.124878  |
|         |         | 1 | 6.982770 | 1.803519  | 1.321953  |
|         |         | 6 | 7.703482 | 1.679356  | -0.724880 |
|         |         | 1 | 8.237806 | 0.952403  | -1.347640 |
|         |         | 1 | 6.742842 | 1.863088  | -1.217777 |

|  |  |   |           |           |           |
|--|--|---|-----------|-----------|-----------|
|  |  | 6 | 8.503765  | 2.983767  | -0.638388 |
|  |  | 1 | 8.678309  | 3.403449  | -1.633932 |
|  |  | 1 | 9.482097  | 2.824176  | -0.169223 |
|  |  | 1 | 7.972048  | 3.740058  | -0.049242 |
|  |  | 6 | 7.427176  | -1.402995 | 0.957241  |
|  |  | 1 | 6.734061  | -2.175009 | 1.292145  |
|  |  | 1 | 8.079175  | -1.188308 | 1.814250  |
|  |  | 6 | 8.288426  | -1.931406 | -0.203141 |
|  |  | 1 | 9.019348  | -1.163943 | -0.488221 |
|  |  | 1 | 8.873482  | -2.774119 | 0.188830  |
|  |  | 6 | 7.496507  | -2.378238 | -1.436172 |
|  |  | 1 | 8.172059  | -2.714653 | -2.229466 |
|  |  | 1 | 6.887382  | -1.562658 | -1.838615 |
|  |  | 1 | 6.823299  | -3.209549 | -1.199726 |
|  |  | 8 | -0.063359 | -2.264871 | -0.010109 |
|  |  | 8 | -2.710121 | -2.372421 | -0.264174 |
|  |  | 8 | -2.575970 | 2.521582  | -0.230496 |
|  |  | 7 | -6.676038 | 0.175086  | -0.664774 |
|  |  | 6 | -0.028248 | -1.011467 | -0.004466 |
|  |  | 6 | -1.047621 | 0.029678  | -0.100569 |
|  |  | 1 | -1.723061 | -2.414167 | -0.171899 |
|  |  | 6 | -2.444510 | 0.069000  | -0.236326 |
|  |  | 1 | -1.588440 | 2.507495  | -0.138173 |
|  |  | 6 | -3.240241 | -1.137993 | -0.312146 |
|  |  | 6 | -4.616564 | -1.085693 | -0.443140 |
|  |  | 1 | -5.126602 | -2.036155 | -0.493161 |
|  |  | 6 | -5.310816 | 0.150062  | -0.519570 |
|  |  | 6 | -4.549064 | 1.344736  | -0.438302 |
|  |  | 1 | -5.006594 | 2.322537  | -0.446747 |
|  |  | 6 | -3.172875 | 1.318851  | -0.303670 |
|  |  | 6 | -7.460698 | -1.066439 | -0.664846 |
|  |  | 1 | -8.426133 | -0.833067 | -1.124871 |
|  |  | 1 | -6.982773 | -1.803545 | -1.321927 |

|  |        |   |           |           |           |
|--|--------|---|-----------|-----------|-----------|
|  |        | 6 | -7.703484 | -1.679338 | 0.724904  |
|  |        | 1 | -8.237804 | -0.952369 | 1.347649  |
|  |        | 1 | -6.742844 | -1.863063 | 1.217805  |
|  |        | 6 | -8.503772 | -2.983747 | 0.638439  |
|  |        | 1 | -8.678319 | -3.403406 | 1.633992  |
|  |        | 1 | -9.482103 | -2.824162 | 0.169269  |
|  |        | 1 | -7.972057 | -3.740053 | 0.049310  |
|  |        | 6 | -7.427172 | 1.402978  | -0.957287 |
|  |        | 1 | -6.734055 | 2.174985  | -1.292204 |
|  |        | 1 | -8.079165 | 1.188272  | -1.814296 |
|  |        | 6 | -8.288429 | 1.931414  | 0.203078  |
|  |        | 1 | -9.019351 | 1.163958  | 0.488172  |
|  |        | 1 | -8.873483 | 2.774118  | -0.188916 |
|  |        | 6 | -7.496516 | 2.378277  | 1.436102  |
|  |        | 1 | -8.172072 | 2.714709  | 2.229385  |
|  |        | 1 | -6.887391 | 1.562708  | 1.838568  |
|  |        | 1 | -6.823308 | 3.209584  | 1.199639  |
|  | Cation | 8 | -0.063654 | -2.261975 | 0.018656  |
|  |        | 8 | -2.707246 | -2.376268 | 0.277123  |
|  |        | 8 | -2.572502 | 2.527506  | 0.231637  |
|  |        | 7 | -6.646404 | 0.176424  | 0.697077  |
|  |        | 6 | -0.028637 | -1.019226 | 0.007783  |
|  |        | 6 | -1.053385 | 0.030357  | 0.104167  |
|  |        | 1 | -1.723134 | -2.428652 | 0.183968  |
|  |        | 6 | -2.440256 | 0.070119  | 0.242388  |
|  |        | 1 | -1.587875 | 2.523860  | 0.134007  |
|  |        | 6 | -3.241052 | -1.152305 | 0.325025  |
|  |        | 6 | -4.607679 | -1.094558 | 0.462047  |
|  |        | 1 | -5.123342 | -2.040859 | 0.522957  |
|  |        | 6 | -5.302703 | 0.151775  | 0.543199  |
|  |        | 6 | -4.538203 | 1.356492  | 0.460772  |
|  |        | 1 | -5.000325 | 2.331453  | 0.475190  |
|  |        | 6 | -3.171626 | 1.335332  | 0.313225  |

|  |  |   |           |           |           |
|--|--|---|-----------|-----------|-----------|
|  |  | 6 | -7.450767 | -1.065862 | 0.673751  |
|  |  | 1 | -8.417593 | -0.817583 | 1.117344  |
|  |  | 1 | -6.987443 | -1.802816 | 1.337471  |
|  |  | 6 | -7.669365 | -1.660573 | -0.728352 |
|  |  | 1 | -8.164150 | -0.916385 | -1.361653 |
|  |  | 1 | -6.702585 | -1.874773 | -1.196322 |
|  |  | 6 | -8.514007 | -2.938247 | -0.662756 |
|  |  | 1 | -8.670320 | -3.347105 | -1.664878 |
|  |  | 1 | -9.500163 | -2.746270 | -0.225616 |
|  |  | 1 | -8.025431 | -3.712768 | -0.061078 |
|  |  | 6 | -7.413596 | 1.413570  | 0.958598  |
|  |  | 1 | -6.729728 | 2.197866  | 1.278231  |
|  |  | 1 | -8.058420 | 1.195872  | 1.817087  |
|  |  | 6 | -8.275817 | 1.896432  | -0.220477 |
|  |  | 1 | -8.999400 | 1.117480  | -0.487717 |
|  |  | 1 | -8.868248 | 2.738073  | 0.158529  |
|  |  | 6 | -7.486702 | 2.332953  | -1.458502 |
|  |  | 1 | -8.168784 | 2.661934  | -2.247940 |
|  |  | 1 | -6.880545 | 1.517137  | -1.866172 |
|  |  | 1 | -6.817433 | 3.170510  | -1.233689 |
|  |  | 8 | 0.063643  | 2.261988  | -0.018693 |
|  |  | 8 | 2.707259  | 2.376289  | -0.276881 |
|  |  | 8 | 2.572498  | -2.527494 | -0.231948 |
|  |  | 7 | 6.646410  | -0.176371 | -0.697070 |
|  |  | 6 | 0.028632  | 1.019240  | -0.007807 |
|  |  | 6 | 1.053382  | -0.030344 | -0.104191 |
|  |  | 1 | 1.723154  | 2.428671  | -0.183648 |
|  |  | 6 | 2.440255  | -0.070101 | -0.242412 |
|  |  | 1 | 1.587864  | -2.523864 | -0.134393 |
|  |  | 6 | 3.241055  | 1.152328  | -0.324937 |
|  |  | 6 | 4.607683  | 1.094591  | -0.461952 |
|  |  | 1 | 5.123349  | 2.040897  | -0.522766 |
|  |  | 6 | 5.302707  | -0.151735 | -0.543205 |

|  |       |   |           |           |           |
|--|-------|---|-----------|-----------|-----------|
|  |       | 6 | 4.538204  | -1.356458 | -0.460892 |
|  |       | 1 | 5.000323  | -2.331418 | -0.475405 |
|  |       | 6 | 3.171625  | -1.335310 | -0.313360 |
|  |       | 6 | 7.450775  | 1.065911  | -0.673622 |
|  |       | 1 | 8.417603  | 0.817671  | -1.117233 |
|  |       | 1 | 6.987457  | 1.802929  | -1.337275 |
|  |       | 6 | 7.669368  | 1.660487  | 0.728539  |
|  |       | 1 | 8.164151  | 0.916238  | 1.361771  |
|  |       | 1 | 6.702587  | 1.874643  | 1.196526  |
|  |       | 6 | 8.514012  | 2.938166  | 0.663069  |
|  |       | 1 | 8.670320  | 3.346929  | 1.665231  |
|  |       | 1 | 9.500170  | 2.746230  | 0.225917  |
|  |       | 1 | 8.025440  | 3.712745  | 0.061462  |
|  |       | 6 | 7.413601  | -1.413495 | -0.958699 |
|  |       | 1 | 6.729736  | -2.197760 | -1.278411 |
|  |       | 1 | 8.058435  | -1.195718 | -1.817161 |
|  |       | 6 | 8.275810  | -1.896467 | 0.220341  |
|  |       | 1 | 8.999390  | -1.117539 | 0.487662  |
|  |       | 1 | 8.868246  | -2.738072 | -0.158737 |
|  |       | 6 | 7.486681  | -2.333103 | 1.458316  |
|  |       | 1 | 8.168755  | -2.662159 | 2.247731  |
|  |       | 1 | 6.880521  | -1.517324 | 1.866057  |
|  |       | 1 | 6.817413  | -3.170638 | 1.233418  |
|  | Anion | 8 | -0.025017 | -2.248808 | 0.279370  |
|  |       | 8 | -2.696379 | -2.375106 | 0.461405  |
|  |       | 8 | -2.642457 | 2.475984  | -0.125797 |
|  |       | 7 | -6.766757 | 0.142561  | 0.431523  |
|  |       | 6 | -0.010982 | -0.997212 | 0.123849  |
|  |       | 6 | -1.055670 | 0.020453  | 0.069605  |
|  |       | 1 | -1.705498 | -2.389214 | 0.404417  |
|  |       | 6 | -2.483559 | 0.047409  | 0.165393  |
|  |       | 1 | -1.652730 | 2.451592  | -0.193561 |
|  |       | 6 | -3.253258 | -1.141072 | 0.354156  |

|  |  |   |           |           |           |
|--|--|---|-----------|-----------|-----------|
|  |  | 6 | -4.646815 | -1.109144 | 0.451466  |
|  |  | 1 | -5.137142 | -2.060207 | 0.609718  |
|  |  | 6 | -5.356186 | 0.101390  | 0.360446  |
|  |  | 6 | -4.618910 | 1.284396  | 0.157083  |
|  |  | 1 | -5.102603 | 2.243921  | 0.025624  |
|  |  | 6 | -3.228209 | 1.266461  | 0.070252  |
|  |  | 6 | -7.515156 | -1.110370 | 0.471582  |
|  |  | 1 | -8.528334 | -0.875051 | 0.815977  |
|  |  | 1 | -7.095320 | -1.802717 | 1.221396  |
|  |  | 6 | -7.620977 | -1.817280 | -0.888550 |
|  |  | 1 | -8.134108 | -1.146311 | -1.589111 |
|  |  | 1 | -6.616647 | -1.979551 | -1.292923 |
|  |  | 6 | -8.367019 | -3.152835 | -0.793022 |
|  |  | 1 | -8.448870 | -3.632524 | -1.774459 |
|  |  | 1 | -9.384481 | -3.018301 | -0.403153 |
|  |  | 1 | -7.847214 | -3.851481 | -0.126495 |
|  |  | 6 | -7.423963 | 1.270237  | 1.096157  |
|  |  | 1 | -6.665402 | 2.005352  | 1.371584  |
|  |  | 1 | -7.873576 | 0.924314  | 2.043871  |
|  |  | 6 | -8.513455 | 1.947567  | 0.247227  |
|  |  | 1 | -9.272956 | 1.202786  | -0.028247 |
|  |  | 1 | -9.025944 | 2.684134  | 0.882767  |
|  |  | 6 | -7.979958 | 2.628620  | -1.017337 |
|  |  | 1 | -8.796548 | 3.048527  | -1.615994 |
|  |  | 1 | -7.430429 | 1.915586  | -1.639636 |
|  |  | 1 | -7.294113 | 3.446711  | -0.768207 |
|  |  | 8 | 0.025037  | 2.248790  | -0.279677 |
|  |  | 8 | 2.696355  | 2.375120  | -0.461319 |
|  |  | 8 | 2.642422  | -2.475957 | 0.125688  |
|  |  | 7 | 6.766783  | -0.142529 | -0.431329 |
|  |  | 6 | 0.010991  | 0.997194  | -0.124158 |
|  |  | 6 | 1.055684  | -0.020452 | -0.069766 |
|  |  | 1 | 1.705468  | 2.389148  | -0.404410 |



|         |         |   |           |           |           |
|---------|---------|---|-----------|-----------|-----------|
|         |         | 6 | 2.483576  | -0.047394 | -0.165446 |
|         |         | 1 | 1.652694  | -2.451503 | 0.193410  |
|         |         | 6 | 3.253267  | 1.141098  | -0.354114 |
|         |         | 6 | 4.646833  | 1.109184  | -0.451351 |
|         |         | 1 | 5.137167  | 2.060253  | -0.609548 |
|         |         | 6 | 5.356198  | -0.101350 | -0.360330 |
|         |         | 6 | 4.618922  | -1.284370 | -0.157041 |
|         |         | 1 | 5.102626  | -2.243889 | -0.025574 |
|         |         | 6 | 3.228215  | -1.266444 | -0.070294 |
|         |         | 6 | 7.515162  | 1.110422  | -0.471179 |
|         |         | 1 | 8.528392  | 0.875152  | -0.815453 |
|         |         | 1 | 7.095420  | 1.802834  | -1.220990 |
|         |         | 6 | 7.620786  | 1.817202  | 0.889034  |
|         |         | 1 | 8.133839  | 1.146174  | 1.589596  |
|         |         | 1 | 6.616401  | 1.979414  | 1.293293  |
|         |         | 6 | 8.366812  | 3.152782  | 0.793735  |
|         |         | 1 | 8.448524  | 3.632375  | 1.775229  |
|         |         | 1 | 9.384328  | 3.018309  | 0.403985  |
|         |         | 1 | 7.847079  | 3.851484  | 0.127209  |
|         |         | 6 | 7.423950  | -1.270017 | -1.096337 |
|         |         | 1 | 6.665376  | -2.005083 | -1.371858 |
|         |         | 1 | 7.873442  | -0.923840 | -2.044019 |
|         |         | 6 | 8.513554  | -1.947536 | -0.247705 |
|         |         | 1 | 9.273069  | -1.202813 | 0.027888  |
|         |         | 1 | 9.025994  | -2.683921 | -0.883495 |
|         |         | 6 | 7.980210  | -2.628942 | 1.016734  |
|         |         | 1 | 8.796873  | -3.048997 | 1.615187  |
|         |         | 1 | 7.430739  | -1.916083 | 1.639283  |
|         |         | 1 | 7.294352  | -3.446978 | 0.767459  |
| Motif-4 | Neutral | 8 | -0.088328 | 2.264044  | -0.000225 |
|         |         | 8 | 2.526774  | 2.548075  | -0.412058 |
|         |         | 1 | 1.547524  | 2.523587  | -0.255907 |
|         |         | 8 | 2.714373  | -2.344437 | -0.424074 |

|  |  |   |           |           |           |
|--|--|---|-----------|-----------|-----------|
|  |  | 1 | 1.735864  | -2.396224 | -0.268031 |
|  |  | 7 | 6.615820  | 0.244299  | -1.099349 |
|  |  | 6 | -0.039415 | 1.011065  | -0.000309 |
|  |  | 6 | 1.038556  | 0.040423  | -0.168491 |
|  |  | 6 | 2.423197  | 0.094133  | -0.394679 |
|  |  | 6 | 3.131338  | 1.351420  | -0.516998 |
|  |  | 6 | 4.495345  | 1.391542  | -0.741559 |
|  |  | 1 | 4.940542  | 2.374086  | -0.785812 |
|  |  | 6 | 5.263813  | 0.204752  | -0.865089 |
|  |  | 6 | 4.590169  | -1.038119 | -0.735904 |
|  |  | 1 | 5.106891  | -1.983117 | -0.813652 |
|  |  | 6 | 3.226135  | -1.104539 | -0.514601 |
|  |  | 6 | 7.331347  | 1.479548  | -1.446188 |
|  |  | 1 | 6.608871  | 2.238050  | -1.748611 |
|  |  | 1 | 7.935045  | 1.264255  | -2.337581 |
|  |  | 6 | 8.252089  | 2.033046  | -0.344969 |
|  |  | 1 | 9.005095  | 1.276111  | -0.086254 |
|  |  | 1 | 8.809077  | 2.873959  | -0.781990 |
|  |  | 6 | 7.536188  | 2.500632  | 0.928503  |
|  |  | 1 | 6.940486  | 1.676073  | 1.338455  |
|  |  | 1 | 6.822872  | 3.295513  | 0.673808  |
|  |  | 6 | 8.507342  | 3.014184  | 1.997827  |
|  |  | 1 | 7.971650  | 3.347424  | 2.892744  |
|  |  | 1 | 9.096134  | 3.861761  | 1.627287  |
|  |  | 1 | 9.211315  | 2.231113  | 2.304183  |
|  |  | 6 | 7.414061  | -0.988156 | -1.140709 |
|  |  | 1 | 8.344910  | -0.746457 | -1.663096 |
|  |  | 1 | 6.903619  | -1.735003 | -1.761092 |
|  |  | 6 | 7.751330  | -1.586710 | 0.235282  |
|  |  | 1 | 8.321653  | -0.851246 | 0.816510  |
|  |  | 1 | 6.826295  | -1.772147 | 0.793506  |
|  |  | 6 | 8.553880  | -2.889542 | 0.119165  |
|  |  | 1 | 9.474429  | -2.702827 | -0.451806 |

|  |  |   |           |           |           |
|--|--|---|-----------|-----------|-----------|
|  |  | 1 | 7.976764  | -3.621183 | -0.462929 |
|  |  | 6 | 8.913289  | -3.494059 | 1.481377  |
|  |  | 1 | 9.482438  | -4.422501 | 1.366392  |
|  |  | 1 | 8.012341  | -3.724767 | 2.061260  |
|  |  | 1 | 9.521678  | -2.801272 | 2.074506  |
|  |  | 8 | 0.088335  | -2.264050 | 0.000092  |
|  |  | 8 | -2.526756 | -2.548059 | 0.412124  |
|  |  | 1 | -1.547509 | -2.523574 | 0.255946  |
|  |  | 8 | -2.714350 | 2.344440  | 0.423477  |
|  |  | 1 | -1.735877 | 2.396172  | 0.267194  |
|  |  | 7 | -6.615756 | -0.244198 | 1.099451  |
|  |  | 6 | 0.039419  | -1.011070 | 0.000100  |
|  |  | 6 | -1.038551 | -0.040427 | 0.168260  |
|  |  | 6 | -2.423185 | -0.094125 | 0.394477  |
|  |  | 6 | -3.131321 | -1.351396 | 0.516962  |
|  |  | 6 | -4.495313 | -1.391489 | 0.741622  |
|  |  | 1 | -4.940512 | -2.374026 | 0.786011  |
|  |  | 6 | -5.263766 | -0.204682 | 0.865090  |
|  |  | 6 | -4.590127 | 1.038174  | 0.735716  |
|  |  | 1 | -5.106844 | 1.983183  | 0.813371  |
|  |  | 6 | -3.226110 | 1.104562  | 0.514302  |
|  |  | 6 | -7.331264 | -1.479408 | 1.446470  |
|  |  | 1 | -6.608770 | -2.237881 | 1.748921  |
|  |  | 1 | -7.934898 | -1.264019 | 2.337883  |
|  |  | 6 | -8.252086 | -2.033017 | 0.345374  |
|  |  | 1 | -9.005106 | -1.276105 | 0.086632  |
|  |  | 1 | -8.809047 | -2.873881 | 0.782523  |
|  |  | 6 | -7.536276 | -2.500741 | -0.928099 |
|  |  | 1 | -6.940599 | -1.676228 | -1.338179 |
|  |  | 1 | -6.822946 | -3.295597 | -0.673371 |
|  |  | 6 | -8.507508 | -3.014401 | -1.997300 |
|  |  | 1 | -7.971880 | -3.347738 | -2.892220 |
|  |  | 1 | -9.096278 | -3.861936 | -1.626630 |

|  |        |   |           |           |           |
|--|--------|---|-----------|-----------|-----------|
|  |        | 1 | -9.211498 | -2.231358 | -2.303689 |
|  |        | 6 | -7.413988 | 0.988265  | 1.140742  |
|  |        | 1 | -8.344802 | 0.746624  | 1.663219  |
|  |        | 1 | -6.903500 | 1.735173  | 1.761012  |
|  |        | 6 | -7.751352 | 1.586681  | -0.235286 |
|  |        | 1 | -8.321719 | 0.851159  | -0.816400 |
|  |        | 1 | -6.826355 | 1.772056  | -0.793595 |
|  |        | 6 | -8.553888 | 2.889528  | -0.119246 |
|  |        | 1 | -9.474398 | 2.702875  | 0.451808  |
|  |        | 1 | -7.976728 | 3.621225  | 0.462734  |
|  |        | 6 | -8.913389 | 3.493908  | -1.481494 |
|  |        | 1 | -9.482524 | 4.422366  | -1.366564 |
|  |        | 1 | -8.012480 | 3.724552  | -2.061463 |
|  |        | 1 | -9.521824 | 2.801065  | -2.074510 |
|  | Cation | 8 | -0.086956 | 2.261292  | 0.015239  |
|  |        | 8 | 2.524431  | 2.553999  | -0.405016 |
|  |        | 1 | 1.548301  | 2.539831  | -0.243841 |
|  |        | 8 | 2.709327  | -2.348376 | -0.444304 |
|  |        | 1 | 1.733932  | -2.410569 | -0.287283 |
|  |        | 7 | 6.583506  | 0.245204  | -1.133268 |
|  |        | 6 | -0.039195 | 1.018834  | 0.006117  |
|  |        | 6 | 1.043975  | 0.041202  | -0.172568 |
|  |        | 6 | 2.418530  | 0.095231  | -0.400962 |
|  |        | 6 | 3.129788  | 1.367819  | -0.523373 |
|  |        | 6 | 4.483292  | 1.403094  | -0.760973 |
|  |        | 1 | 4.933689  | 2.382568  | -0.807381 |
|  |        | 6 | 5.253606  | 0.206293  | -0.890581 |
|  |        | 6 | 4.579261  | -1.047147 | -0.759405 |
|  |        | 1 | 5.100395  | -1.987938 | -0.851429 |
|  |        | 6 | 3.225444  | -1.118800 | -0.531865 |
|  |        | 6 | 7.316663  | 1.489752  | -1.452424 |
|  |        | 1 | 6.603362  | 2.262805  | -1.732853 |
|  |        | 1 | 7.906144  | 1.272371  | -2.349893 |

|  |  |   |           |           |           |
|--|--|---|-----------|-----------|-----------|
|  |  | 6 | 8.249062  | 1.993358  | -0.337696 |
|  |  | 1 | 8.993665  | 1.222249  | -0.103178 |
|  |  | 1 | 8.813009  | 2.832795  | -0.764867 |
|  |  | 6 | 7.545939  | 2.449631  | 0.947335  |
|  |  | 1 | 6.954107  | 1.623552  | 1.362172  |
|  |  | 1 | 6.833664  | 3.250391  | 0.707701  |
|  |  | 6 | 8.533605  | 2.951418  | 2.007380  |
|  |  | 1 | 8.009398  | 3.276595  | 2.911101  |
|  |  | 1 | 9.116389  | 3.801784  | 1.636366  |
|  |  | 1 | 9.240116  | 2.165243  | 2.297189  |
|  |  | 6 | 7.402579  | -0.987617 | -1.155716 |
|  |  | 1 | 8.335156  | -0.730023 | -1.662498 |
|  |  | 1 | 6.905598  | -1.733201 | -1.784391 |
|  |  | 6 | 7.717753  | -1.570303 | 0.232494  |
|  |  | 1 | 8.246585  | -0.817622 | 0.828811  |
|  |  | 1 | 6.785963  | -1.791022 | 0.766044  |
|  |  | 6 | 8.569921  | -2.843914 | 0.130758  |
|  |  | 1 | 9.498895  | -2.619637 | -0.410575 |
|  |  | 1 | 8.036815  | -3.592324 | -0.471121 |
|  |  | 6 | 8.908819  | -3.438547 | 1.502383  |
|  |  | 1 | 9.514417  | -4.343761 | 1.397907  |
|  |  | 1 | 8.001153  | -3.707028 | 2.054459  |
|  |  | 1 | 9.475414  | -2.728152 | 2.114785  |
|  |  | 8 | 0.086988  | -2.261216 | -0.015135 |
|  |  | 8 | -2.524375 | -2.553916 | 0.405379  |
|  |  | 1 | -1.548245 | -2.539759 | 0.244207  |
|  |  | 8 | -2.709381 | 2.348460  | 0.443619  |
|  |  | 1 | -1.734043 | 2.410632  | 0.286235  |
|  |  | 7 | -6.583474 | -0.245060 | 1.133325  |
|  |  | 6 | 0.039210  | -1.018757 | -0.006141 |
|  |  | 6 | -1.043966 | -0.041125 | 0.172496  |
|  |  | 6 | -2.418522 | -0.095146 | 0.400877  |
|  |  | 6 | -3.129758 | -1.367726 | 0.523502  |

|  |       |   |           |           |           |
|--|-------|---|-----------|-----------|-----------|
|  |       | 6 | -4.483255 | -1.402981 | 0.761148  |
|  |       | 1 | -4.933635 | -2.382454 | 0.807735  |
|  |       | 6 | -5.253582 | -0.206170 | 0.890590  |
|  |       | 6 | -4.579262 | 1.047259  | 0.759174  |
|  |       | 1 | -5.100414 | 1.988056  | 0.851017  |
|  |       | 6 | -3.225454 | 1.118893  | 0.531576  |
|  |       | 6 | -7.316601 | -1.489565 | 1.452722  |
|  |       | 1 | -6.603279 | -2.262559 | 1.733259  |
|  |       | 1 | -7.906054 | -1.272037 | 2.350175  |
|  |       | 6 | -8.249030 | -1.993376 | 0.338113  |
|  |       | 1 | -8.993652 | -1.222317 | 0.103486  |
|  |       | 1 | -8.812953 | -2.832746 | 0.765449  |
|  |       | 6 | -7.545945 | -2.449862 | -0.946862 |
|  |       | 1 | -6.954137 | -1.623847 | -1.361862 |
|  |       | 1 | -6.833650 | -3.250571 | -0.707112 |
|  |       | 6 | -8.533638 | -2.951846 | -2.006787 |
|  |       | 1 | -8.009457 | -3.277174 | -2.910469 |
|  |       | 1 | -9.116399 | -3.802156 | -1.635606 |
|  |       | 1 | -9.240169 | -2.165731 | -2.296710 |
|  |       | 6 | -7.402564 | 0.987752  | 1.155589  |
|  |       | 1 | -8.335121 | 0.730231  | 1.662445  |
|  |       | 1 | -6.905575 | 1.733451  | 1.784120  |
|  |       | 6 | -7.717793 | 1.570196  | -0.232711 |
|  |       | 1 | -8.246633 | 0.817405  | -0.828881 |
|  |       | 1 | -6.786023 | 1.790836  | -0.766329 |
|  |       | 6 | -8.569975 | 2.843812  | -0.131165 |
|  |       | 1 | -9.498929 | 2.619615  | 0.410236  |
|  |       | 1 | -8.036859 | 3.592333  | 0.470569  |
|  |       | 6 | -8.908925 | 3.438206  | -1.502881 |
|  |       | 1 | -9.514532 | 4.343429  | -1.398541 |
|  |       | 1 | -8.001281 | 3.706605  | -2.055032 |
|  |       | 1 | -9.475531 | 2.727698  | -2.115143 |
|  | Anion | 8 | -0.023415 | 2.241019  | 0.336680  |

|  |  |   |           |           |           |
|--|--|---|-----------|-----------|-----------|
|  |  | 8 | 2.629131  | 2.493041  | 0.033007  |
|  |  | 1 | 1.645244  | 2.459046  | 0.157632  |
|  |  | 8 | 2.680423  | -2.341510 | -0.675846 |
|  |  | 1 | 1.694611  | -2.364774 | -0.561787 |
|  |  | 7 | 6.728810  | 0.204521  | -0.819181 |
|  |  | 6 | -0.010225 | 0.993739  | 0.149422  |
|  |  | 6 | 1.049651  | 0.030624  | -0.130338 |
|  |  | 6 | 2.469254  | 0.071260  | -0.308419 |
|  |  | 6 | 3.210302  | 1.293248  | -0.226526 |
|  |  | 6 | 4.593428  | 1.324783  | -0.394078 |
|  |  | 1 | 5.076141  | 2.285436  | -0.268190 |
|  |  | 6 | 5.325777  | 0.152950  | -0.668708 |
|  |  | 6 | 4.619648  | -1.060592 | -0.748697 |
|  |  | 1 | 5.105817  | -2.003743 | -0.958576 |
|  |  | 6 | 3.234514  | -1.105983 | -0.571078 |
|  |  | 6 | 7.348569  | 1.363819  | -1.464606 |
|  |  | 1 | 6.573655  | 2.101309  | -1.681750 |
|  |  | 1 | 7.761916  | 1.058628  | -2.441906 |
|  |  | 6 | 8.467134  | 2.018096  | -0.635949 |
|  |  | 1 | 9.239483  | 1.267926  | -0.410860 |
|  |  | 1 | 8.955678  | 2.777895  | -1.264729 |
|  |  | 6 | 7.988676  | 2.660792  | 0.671367  |
|  |  | 1 | 7.439235  | 1.913439  | 1.255367  |
|  |  | 1 | 7.268702  | 3.457555  | 0.440538  |
|  |  | 6 | 9.134059  | 3.238848  | 1.510718  |
|  |  | 1 | 8.760971  | 3.696909  | 2.433650  |
|  |  | 1 | 9.686986  | 4.008439  | 0.957159  |
|  |  | 1 | 9.850790  | 2.457747  | 1.793778  |
|  |  | 6 | 7.480136  | -1.041220 | -0.944191 |
|  |  | 1 | 8.468369  | -0.787520 | -1.343194 |
|  |  | 1 | 7.017366  | -1.711712 | -1.688000 |
|  |  | 6 | 7.672573  | -1.788636 | 0.384589  |
|  |  | 1 | 8.233075  | -1.139993 | 1.071427  |

|  |  |   |           |           |           |
|--|--|---|-----------|-----------|-----------|
|  |  | 1 | 6.695739  | -1.962191 | 0.849760  |
|  |  | 6 | 8.406997  | -3.124009 | 0.211845  |
|  |  | 1 | 9.377297  | -2.950013 | -0.276771 |
|  |  | 1 | 7.833749  | -3.767578 | -0.469717 |
|  |  | 6 | 8.631142  | -3.863277 | 1.536522  |
|  |  | 1 | 9.152899  | -4.814936 | 1.382517  |
|  |  | 1 | 7.677301  | -4.081189 | 2.030635  |
|  |  | 1 | 9.231747  | -3.260941 | 2.229039  |
|  |  | 8 | 0.023512  | -2.240966 | -0.336473 |
|  |  | 8 | -2.629182 | -2.493065 | -0.032786 |
|  |  | 1 | -1.645264 | -2.459260 | -0.157239 |
|  |  | 8 | -2.680583 | 2.341603  | 0.676056  |
|  |  | 1 | -1.694754 | 2.365064  | 0.562136  |
|  |  | 7 | -6.728851 | -0.204520 | 0.819050  |
|  |  | 6 | 0.010298  | -0.993708 | -0.149074 |
|  |  | 6 | -1.049605 | -0.030580 | 0.130595  |
|  |  | 6 | -2.469234 | -0.071215 | 0.308584  |
|  |  | 6 | -3.210291 | -1.293219 | 0.226655  |
|  |  | 6 | -4.593429 | -1.324753 | 0.394100  |
|  |  | 1 | -5.076133 | -2.285408 | 0.268194  |
|  |  | 6 | -5.325806 | -0.152932 | 0.668676  |
|  |  | 6 | -4.619695 | 1.060607  | 0.748718  |
|  |  | 1 | -5.105895 | 2.003748  | 0.958576  |
|  |  | 6 | -3.234549 | 1.106026  | 0.571207  |
|  |  | 6 | -7.348619 | -1.363785 | 1.464526  |
|  |  | 1 | -6.573704 | -2.101257 | 1.681725  |
|  |  | 1 | -7.761990 | -1.058548 | 2.441803  |
|  |  | 6 | -8.467157 | -2.018115 | 0.635876  |
|  |  | 1 | -9.239507 | -1.267965 | 0.410724  |
|  |  | 1 | -8.955712 | -2.777884 | 1.264684  |
|  |  | 6 | -7.988656 | -2.660877 | -0.671392 |
|  |  | 1 | -7.439204 | -1.913549 | -1.255413 |
|  |  | 1 | -7.268684 | -3.457623 | -0.440499 |



|  |  |   |           |           |           |
|--|--|---|-----------|-----------|-----------|
|  |  | 6 | -9.134011 | -3.238983 | -1.510747 |
|  |  | 1 | -8.760892 | -3.697085 | -2.433647 |
|  |  | 1 | -9.686946 | -4.008554 | -0.957167 |
|  |  | 1 | -9.850742 | -2.457903 | -1.793864 |
|  |  | 6 | -7.480197 | 1.041218  | 0.943976  |
|  |  | 1 | -8.468466 | 0.787515  | 1.342888  |
|  |  | 1 | -7.017502 | 1.711723  | 1.687820  |
|  |  | 6 | -7.672518 | 1.788616  | -0.384831 |
|  |  | 1 | -8.232942 | 1.139957  | -1.071716 |
|  |  | 1 | -6.695643 | 1.962184  | -0.849911 |
|  |  | 6 | -8.406982 | 3.123978  | -0.212170 |
|  |  | 1 | -9.377325 | 2.949970  | 0.276356  |
|  |  | 1 | -7.833810 | 3.767564  | 0.469440  |
|  |  | 6 | -8.631014 | 3.863228  | -1.536876 |
|  |  | 1 | -9.152807 | 4.814877  | -1.382932 |
|  |  | 1 | -7.677129 | 4.081157  | -2.030897 |
|  |  | 1 | -9.231536 | 3.260872  | -2.229447 |

Fig. S1: Finger print plots of all motifs broken down into contribution from specific pairs of atom types.

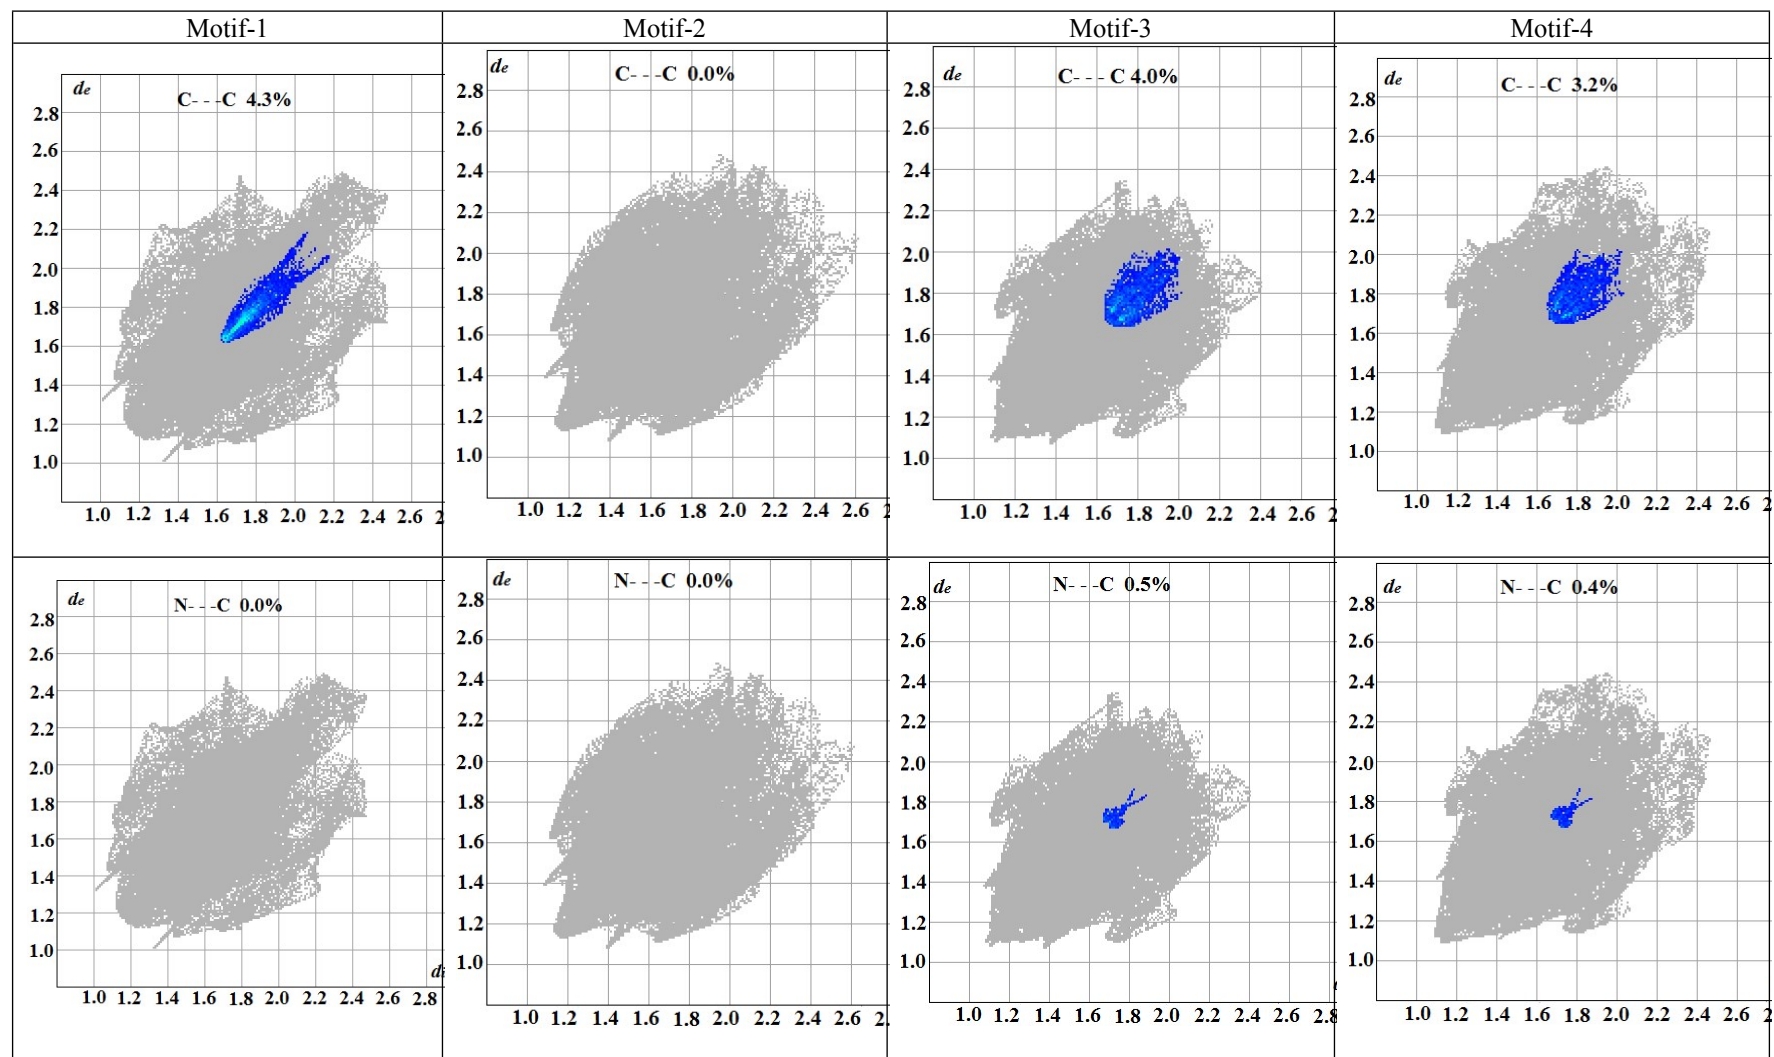

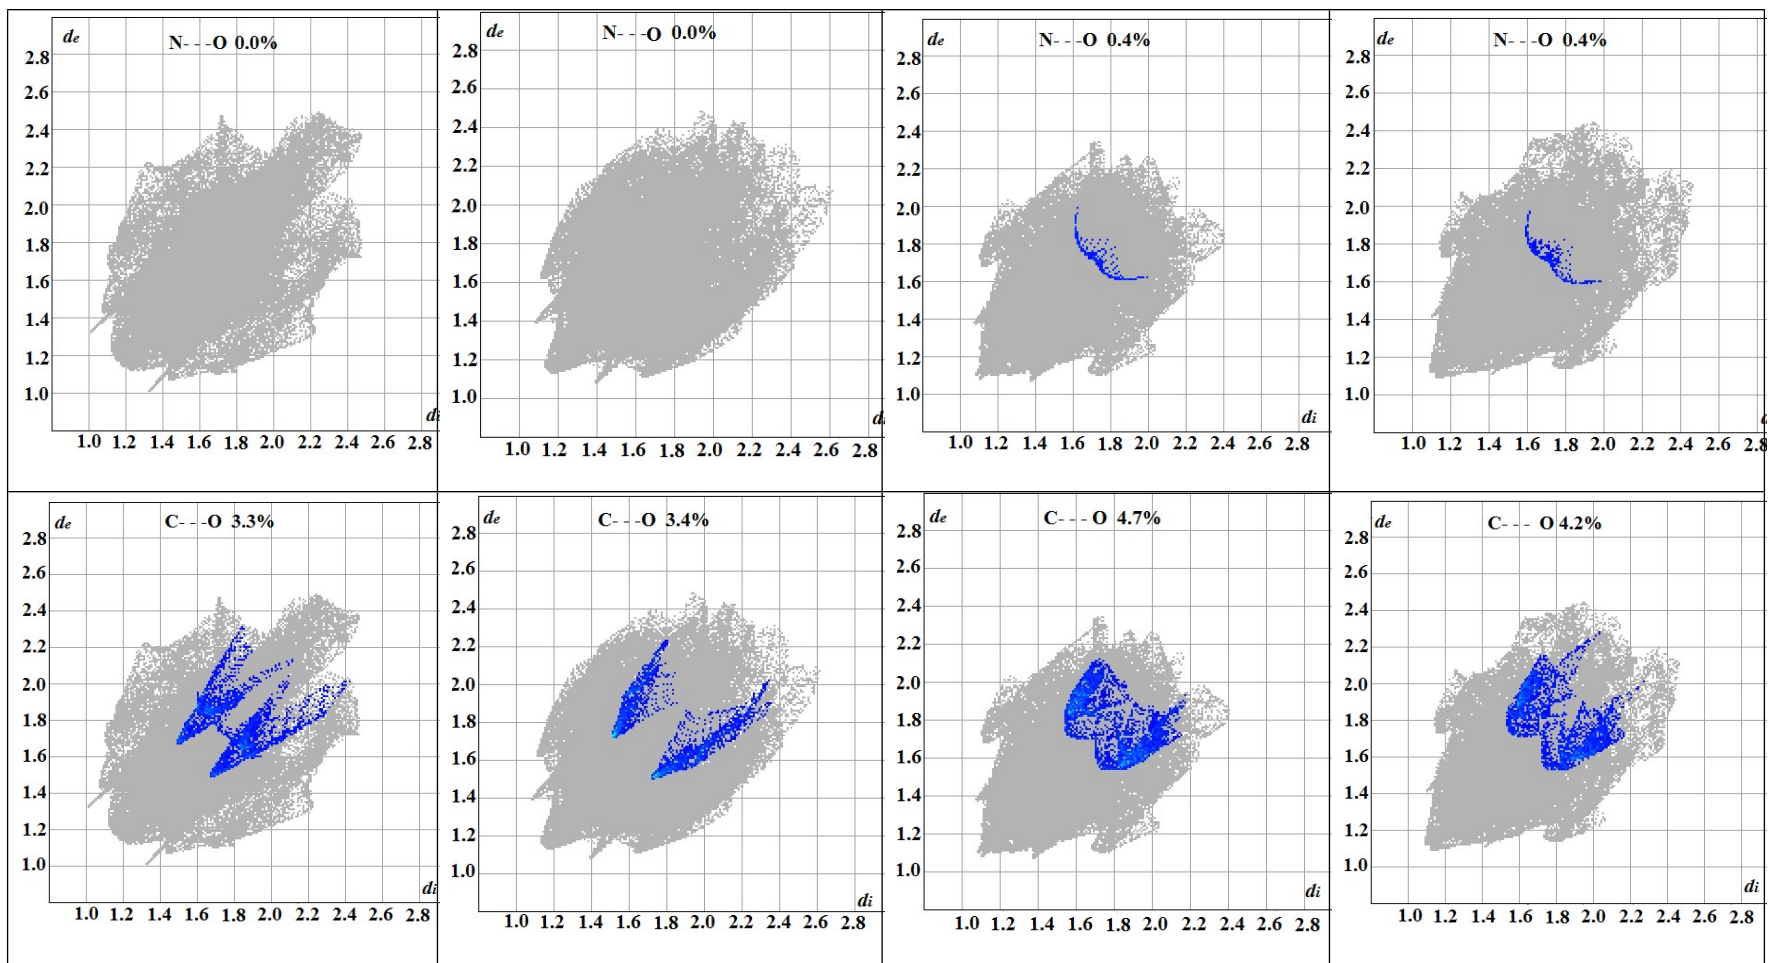

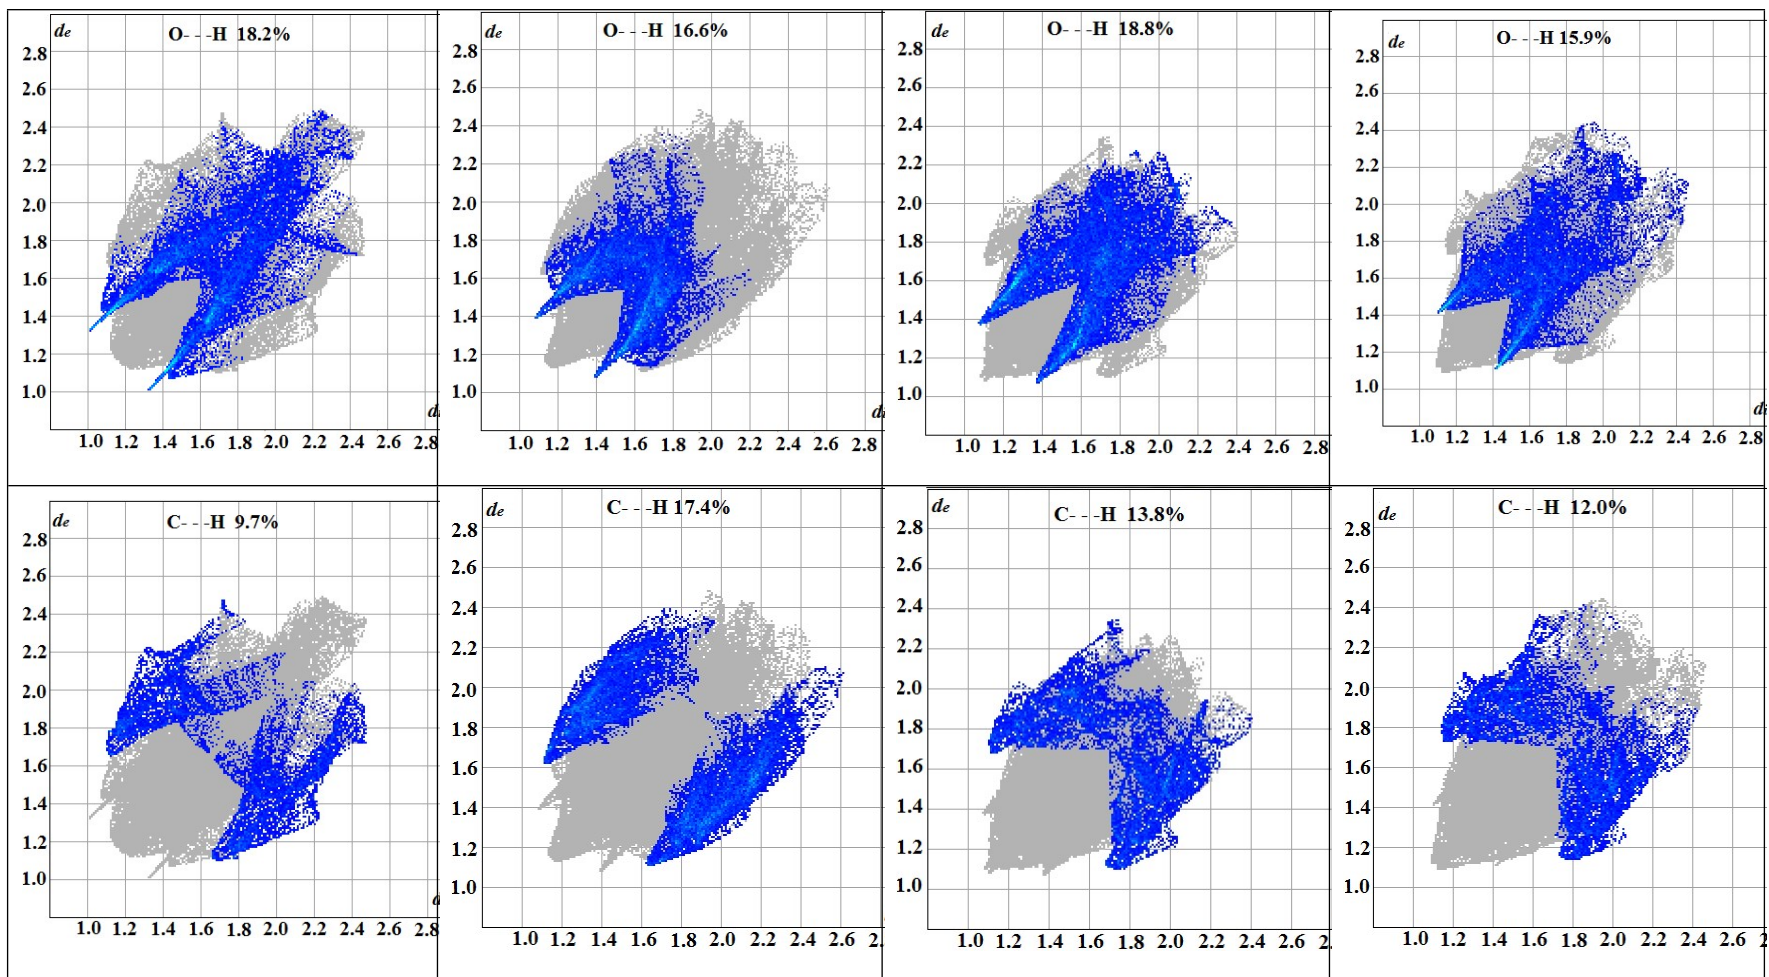

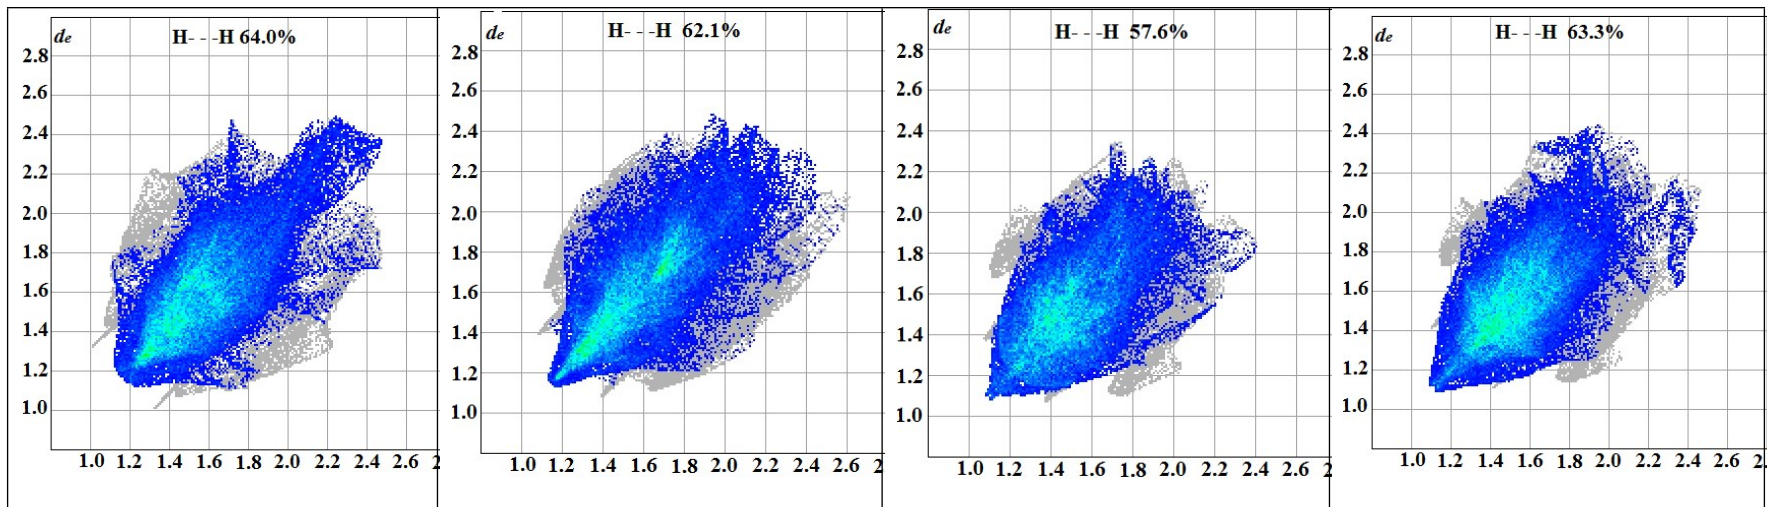

Supplement: d1cp01387d1.pdf [file d1cp01387d1.pdf]
